# Supplementary material for: Gain-of-function miRNA signature by mutant p53 associates with poor cancer outcome
Source: PubMed Central journal article supplement (PMC4905457; doi:10.18632/oncotarget.7090), 2016-01-31
Supplement: oncotarget-07-11056-s001.pdf [file oncotarget-07-11056-s001.pdf]

## Gain-of-function miRNA signature by mutant p53 associates with poor cancer outcome

### Supplementary Materials

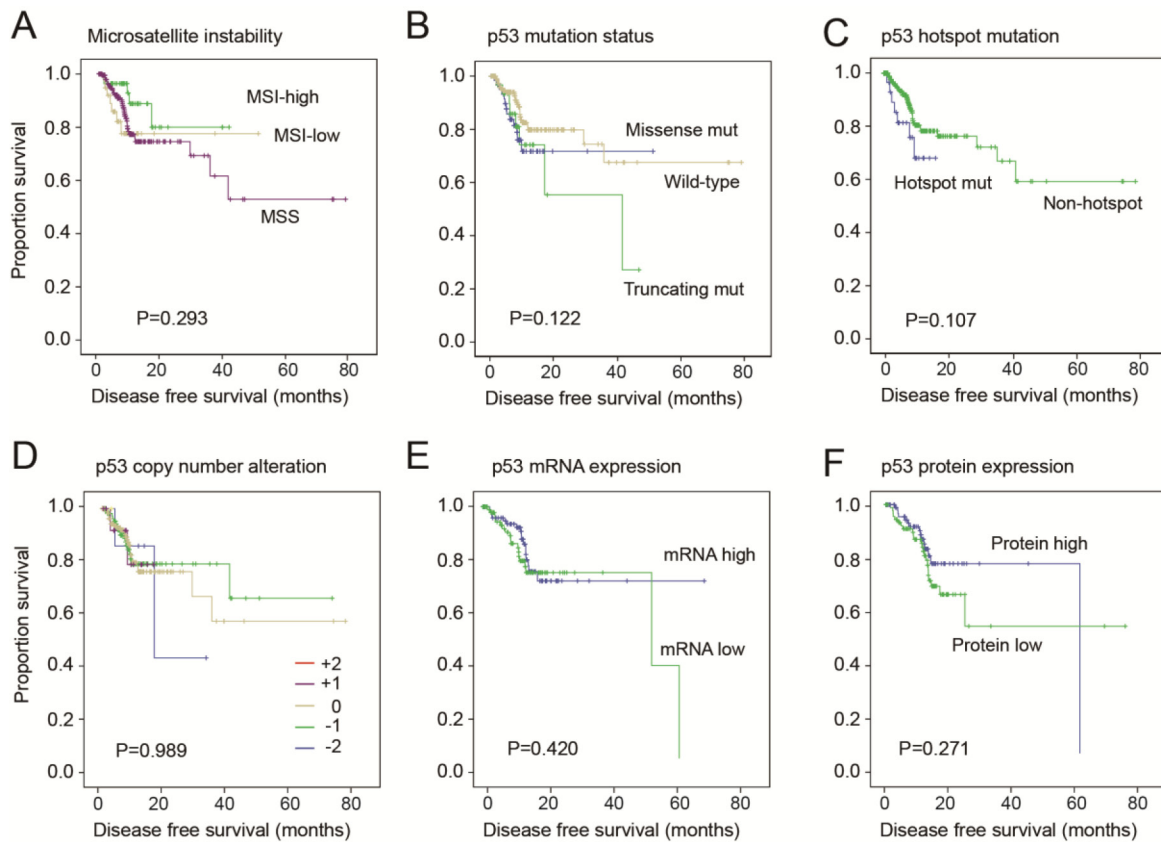

**Supplementary Figure S1: Association of MSI, p53 genetic status and expression with DFS of gastric cancer.** The survival of patients in different groups were compared with the Kaplan-Meier survival test. The criteria of  $P < 0.05$  was used to judge statistical significance.

**Supplementary Table S1: The miRNAs that were downregulated by mutp53 R282W (FC < 0.5,  $P < 0.05$ )**

**Supplementary Table S2: Upregulated miRNAs by mutp53 R282W (FC < 0.5, P < 0.05)**

| miRNA_gene      | control.rep1 | control.rep2 | control.rep3 | mutant_p53.<br>rep1 | mutant_p53.<br>rep2 | mutant_p53.<br>rep3 |
|-----------------|--------------|--------------|--------------|---------------------|---------------------|---------------------|
| hsa-mir-578     | -0.1023048   | 0.00385242   | -0.1035968   | 0.0927383           | 0.1921451           | 0.2258548           |
| ENSG00000252601 | 0.02464659   | -0.08982608  | -0.07201257  | 0.04046368          | 0.1188284           | 0.1356783           |
| ENSG00000261955 | 0.02464659   | -0.08982608  | -0.07201257  | 0.04046368          | 0.1188284           | 0.1356783           |
| hsa-miR-4731-5p | -0.1770857   | 0.05409777   | -0.1966194   | 0.3404264           | 0.08984698          | 0.2125069           |
| hsa-miR-6790-3p | -0.2140777   | 0.01669325   | -0.2377214   | 0.3404264           | 0.407616            | 0.06386299          |
| hsa-mir-510     | 0.009101495  | 0.07270514   | 0.09308218   | 0.2437083           | 0.2635161           | 0.1592286           |
| hsa-miR-1236-3p | -0.01649719  | -0.1973925   | -0.09133096  | 0.1798379           | 0.2125069           | 0.04645495          |
| hsa-mir-3123    | -0.02753729  | 0.1626393    | 0.31572      | 0.6190575           | 0.4776919           | 0.388635            |
| hsa-miR-6802-3p | -0.07787399  | -0.169787    | -0.08024121  | -0.008114949        | 0.2187319           | 0.1922264           |
| hsa-mir-6846    | -0.1535122   | -0.1535122   | -0.1535122   | 0.1353019           | 0.2242937           | 0.1889334           |
| hsa-let-7i      | -0.11206     | -0.05207927  | -0.2969556   | 0.2303855           | 0.07145564          | 0.2215828           |
| ENSG00000252537 | -0.09302633  | -0.03305989  | -0.3335435   | 0.08233424          | 0.1755946           | 0.2494192           |

Normalized expression levels in three experimental repeats are shown in the table.

**Supplementary Table S3: Common and unique miRNAs that were regulated by mutp53 and/or wtp53**

| Features                                   | Number | List of miRNAs                                                                                                                                                                                                                                                                                                                                                                                                                                                                                                                                                                                                                                                                                                                                                                                                                                                                                                                                                                                                                                                                                                                                                                                                                                                                                                                                                            |
|--------------------------------------------|--------|---------------------------------------------------------------------------------------------------------------------------------------------------------------------------------------------------------------------------------------------------------------------------------------------------------------------------------------------------------------------------------------------------------------------------------------------------------------------------------------------------------------------------------------------------------------------------------------------------------------------------------------------------------------------------------------------------------------------------------------------------------------------------------------------------------------------------------------------------------------------------------------------------------------------------------------------------------------------------------------------------------------------------------------------------------------------------------------------------------------------------------------------------------------------------------------------------------------------------------------------------------------------------------------------------------------------------------------------------------------------------|
| Mut_p53_upregulated & WT_p53_upregulated   | 1      | hsa-let-7i                                                                                                                                                                                                                                                                                                                                                                                                                                                                                                                                                                                                                                                                                                                                                                                                                                                                                                                                                                                                                                                                                                                                                                                                                                                                                                                                                                |
| Mut_p53_downregulated & WT_p53_upregulated | 2      | hsa-miR-610<br>hsa-miR-3065-3p                                                                                                                                                                                                                                                                                                                                                                                                                                                                                                                                                                                                                                                                                                                                                                                                                                                                                                                                                                                                                                                                                                                                                                                                                                                                                                                                            |
| WT_p53_upregulated                         | 100    | hsa-miR-193a-3p hsa-miR-3937 hsa-miR-877 hsa-miR-1266 hsa-miR-138-1 hsa-miR-548s hsa-miR-1468 hsa-miR-22 hsa-miR-127-3p hsa-miR-625 hsa-miR-592 hsa-miR-192 hsa-miR-766 hsa-miR-570 hsa-miR-940 hsa-miR-1294 hsa-miR-222 hsa-miR-210 hsa-miR-3168 hsa-miR-125a-3p hsa-miR-193a-5p hsa-miR-195 hsa-miR-548j hsa-miR-549 hsa-miR-3605-3p hsa-miR-1304 hsa-miR-629 hsa-miR-3613-3p hsa-miR-3174 hsa-miR-491-3p hsa-miR-335 hsa-miR-452 hsa-miR-1274a hsa-miR-362-3p hsa-miR-33b hsa-miR-1229 hsa-miR-3663-5p hsa-miR-143 hsa-miR-142-5p hsa-miR-3197 hsa-miR-3162 hsa-miR-301a hsa-miR-449a hsa-miR-141 hsa-miR-203 hsa-miR-361-3p hsa-miR-194 hsa-miR-18a hsa-miR-205 hsa-miR-224 hsa-miR-185 hsa-miR-3938 hsa-miR-199a-3p hsa-miR-99b hsa-miR-483-5p hsa-let-7e hsa-miR-199a-5p hsa-miR-937 hsa-miR-1287 hsa-miR-339-5p hsa-miR-486-5p hsa-miR-576-5p hsa-miR-3617 hsa-miR-3925 hsa-miR-23a hsa-miR-891a hsa-miR-4286 hsa-miR-199b-3p hsa-miR-641 hsa-miR-577 hsa-miR-188-5p hsa-miR-652 hsa-miR-371-5p hsa-miR-324-3p hsa-miR-373 hsa-miR-200c hsa-miR-145 hsa-miR-130a hsa-miR-148b hsa-miR-3691 hsa-miR-362-5p hsa-miR-1914 hsa-miR-371-3p hsa-miR-573 hsa-miR-3164 hsa-miR-218 hsa-miR-372 hsa-miR-499-3p hsa-miR-188-3p hsa-miR-2355-3p hsa-miR-548u hsa-miR-29c hsa-miR-132 hsa-miR-3661 hsa-miR-215 hsa-miR-1293 hsa-miR-34c-3p hsa-miR-95 hsa-miR-34a hsa-miR-1976 |
| WT_p53_downregulated                       | 91     | hsa-miR-140-5p hsa-miR-146a hsa-miR-502-3p hsa-miR-1538 hsa-miR-200b hsa-miR-32 hsa-miR-1254 hsa-miR-3191 hsa-miR-18b hsa-miR-3200-5p hsa-miR-1226 hsa-miR-1262 hsa-miR-125b hsa-miR-542-3p hsa-miR-3613-5p hsa-miR-219-1-3p hsa-miR-429 hsa-miR-508-3p hsa-let-7g hsa-miR-616 hsa-miR-374b hsa-miR-181a hsa-miR-184 hsa-miR-378c hsa-miR-2110 hsa-miR-221 hsa-miR-935 hsa-miR-636 hsa-miR-3928 hsa-miR-3130-5p hsa-miR-200a hsa-miR-30d hsa-miR-93 hsa-miR-3181 hsa-miR-3939 hsa-miR-23b hsa-miR-551a hsa-miR-330-3p hsa-miR-378 hsa-miR-191 hsa-miR-381 hsa-miR-3192 hsa-miR-150 hsa-miR-2277-5p hsa-miR-1908 hsa-miR-501-5p hsa-miR-574-3p hsa-miR-92a-1 hsa-miR-4326 hsa-miR-3909 hsa-miR-92b hsa-miR-130b hsa-miR-3120 hsa-miR-378b hsa-miR-339-3p hsa-miR-3130-3p hsa-miR-182 hsa-miR-615-3p hsa-miR-454 hsa-miR-30b hsa-miR-3188 hsa-miR-29b-1 hsa-miR-25 hsa-miR-2116 hsa-miR-365 hsa-miR-1305 hsa-miR-3200-3p hsa-miR-30a hsa-miR-20a hsa-miR-425 hsa-miR-3124 hsa-miR-627 hsa-miR-1 hsa-miR-1227 hsa-miR-196b hsa-miR-767-5p hsa-miR-340 hsa-miR-499-5p hsa-miR-3194 hsa-miR-484 hsa-miR-720 hsa-miR-664 hsa-miR-3131 hsa-miR-320d hsa-miR-3187 hsa-miR-590-3p hsa-miR-1275 hsa-miR-142-3p hsa-miR-3159 hsa-miR-589 hsa-miR-939                                                                                                                                 |
| Mut_p53_upregulated                        | 11     | hsa-miR-6790-3p ENSG00000252601 hsa-miR-4731-5p hsa-mir-510 hsa-mir-3123 ENSG00000261955 ENSG00000252537 hsa-miR-6802-3p hsa-miR-1236-3p hsa-mir-578 hsa-mir-6846                                                                                                                                                                                                                                                                                                                                                                                                                                                                                                                                                                                                                                                                                                                                                                                                                                                                                                                                                                                                                                                                                                                                                                                                         |

|                       |     |                                                                                                                                                                                                                                                                                                                                                                                                                                                                                                                                                                                                                                                                                                                                                                                                                                                                                                                                                                                                                                                                                                                                                                                                                                                                                                                                                                                                                                                                                                                                                                                                                                                                                                                                                                                                                                                                                                                                                                                                                                                                                                                                                                                                                                                                                                                                                                                                                                                                                                                                                                                                                                                                                                                                                                                                                                                                          |
|-----------------------|-----|--------------------------------------------------------------------------------------------------------------------------------------------------------------------------------------------------------------------------------------------------------------------------------------------------------------------------------------------------------------------------------------------------------------------------------------------------------------------------------------------------------------------------------------------------------------------------------------------------------------------------------------------------------------------------------------------------------------------------------------------------------------------------------------------------------------------------------------------------------------------------------------------------------------------------------------------------------------------------------------------------------------------------------------------------------------------------------------------------------------------------------------------------------------------------------------------------------------------------------------------------------------------------------------------------------------------------------------------------------------------------------------------------------------------------------------------------------------------------------------------------------------------------------------------------------------------------------------------------------------------------------------------------------------------------------------------------------------------------------------------------------------------------------------------------------------------------------------------------------------------------------------------------------------------------------------------------------------------------------------------------------------------------------------------------------------------------------------------------------------------------------------------------------------------------------------------------------------------------------------------------------------------------------------------------------------------------------------------------------------------------------------------------------------------------------------------------------------------------------------------------------------------------------------------------------------------------------------------------------------------------------------------------------------------------------------------------------------------------------------------------------------------------------------------------------------------------------------------------------------------------|
| Mut_p53_downregulated | 182 | <p> hsa-miR-1185-5p ENSG00000212539 hsa-miR-1199-5p hsa-mir-149<br/> ENSG00000221093 hsa-miR-1273d hsa-miR-1243 U32B hsa-mir-4793<br/> ENSG00000252878 hsa-miR-3619-3p ENSG00000201863 hsa-miR-<br/> 6503-3p hsa-mir-342 U107 ENSG00000206603 hsa-miR-4698 hsa-<br/> mir-3616 ENSG00000253091 hsa-miR-6807-3p hsa-miR-548w hsa-mir-224<br/> ENSG00000238588 hsa-mir-449b hsa-mir-18a U42B ENSG00000221060 hsa-<br/> miR-5089-5p ENSG00000221139 ENSG00000212458 hsa-miR-6804-5p<br/> hsa-mir-660 ENSG00000238556 hsa-mir-2053 ACA66 hsa-miR-4256 hsa-<br/> miR-4468 hsa-miR-2114-3p hsa-miR-5692a hsa-mir-421 hsa-miR-3163<br/> ENSG00000239086 hsa-miR-7151-3p hsa-miR-516b-3p hsa-mir-4743 hsa-<br/> mir-3606 HBI-100 hsa-miR-6839-5p hsa-mir-512-1 hsa-miR-3972<br/> ENSG00000212589 hsa-miR-4659a-3p hsa-miR-146a-5p hsa-mir-3150a hsa-<br/> miR-6834-3p hsa-mir-6080 hsa-miR-6742-5p mgU6-53 hsa-mir-512-2 hsa-<br/> mir-6757 hsa-mir-6811 hsa-miR-490-3p hsa-miR-6881-5p hsa-miR-424-5p<br/> hsa-miR-3976 ENSG00000238732 hsa-miR-548e-5p hsa-miR-516a-3p<br/> hsa-miR-670-5p hsa-miR-661 ENSG00000251866 hsa-miR-6793-5p<br/> ENSG00000252724 hsa-miR-4799-5p ENSG00000207171 hsa-mir-5681a<br/> hsa-mir-548i-4 hsa-mir-2392 hsa-miR-4525 hsa-miR-7844-5p hsa-mir-378g<br/> hsa-miR-597-5p ENSG00000238935 hsa-miR-4472 hsa-miR-3191-5p<br/> hsa-miR-6872-3p hsa-miR-302a-5p ENSG00000201229 hsa-mir-4754 hsa-<br/> miR-4499 hsa-mir-3190 hsa-miR-370-3p hsa-mir-4319 hsa-miR-6716-3p<br/> hsa-mir-3182 ENSG00000252800 hsa-mir-591 hsa-mir-5088 hsa-miR-<br/> 335-5p hsa-miR-6735-5p hsa-mir-6780a hsa-mir-3143 ENSG00000200377<br/> ENSG00000238885 hsa-mir-7111 ENSG00000252133 hsa-miR-<br/> 3607-5p hsa-mir-7702 ENSG00000200072 ENSG00000252617 hsa-<br/> miR-186-5p hsa-mir-1302-6 hsa-miR-6129 ENSG00000212175<br/> ENSG00000252048 ENSG00000251830 hsa-mir-575 hsa-miR-338-5p<br/> hsa-mir-4496 ENSG00000253028 hsa-mir-548aa-1 hsa-mir-485<br/> ENSG00000252728 hsa-miR-6872-5p hsa-mir-7850 ENSG00000251817 hsa-<br/> miR-548z HBII-52-19 hsa-mir-1253 HBII-52-17 ENSG00000238389 hsa-<br/> miR-137 hsa-mir-3922 hsa-mir-4452 hsa-mir-6083 ENSG00000262064 hsa-<br/> mir-6882 hsa-mir-6829 ENSG00000251878 hsa-mir-4288 hsa-miR-4746-5p<br/> ENSG00000252265 hsa-miR-4711-3p hsa-miR-3591-3p hsa-miR-3151-5p<br/> ACA50 ENSG00000239111 hsa-miR-2113 hsa-mir-1290 hsa-miR-548 h-3p<br/> ACA68 hsa-mir-8052 hsa-miR-509-5p HBII-52-18 hsa-miR-98-5p hsa-<br/> mir-4441 hsa-mir-6133 hsa-miR-3659 hsa-mir-1301 ENSG00000238690 hsa-<br/> miR-147b hsa-mir-3122 ENSG00000252883 hsa-mir-3655 hsa-miR-<br/> 1255b-5p hsa-miR-3622b-5p ENSG00000238914 hsa-miR-216a-5p U71b<br/> ENSG00000252236 hsa-mir-9-3 HBII-85-15 U72 ENSG00000252668<br/> SNORA36C hsa-miR-6830-5p hsa-mir-3185 hsa-miR-4653-3p hsa-miR-<br/> 6875-5p HBII-52-44 hsa-miR-744-3p </p> |
|-----------------------|-----|--------------------------------------------------------------------------------------------------------------------------------------------------------------------------------------------------------------------------------------------------------------------------------------------------------------------------------------------------------------------------------------------------------------------------------------------------------------------------------------------------------------------------------------------------------------------------------------------------------------------------------------------------------------------------------------------------------------------------------------------------------------------------------------------------------------------------------------------------------------------------------------------------------------------------------------------------------------------------------------------------------------------------------------------------------------------------------------------------------------------------------------------------------------------------------------------------------------------------------------------------------------------------------------------------------------------------------------------------------------------------------------------------------------------------------------------------------------------------------------------------------------------------------------------------------------------------------------------------------------------------------------------------------------------------------------------------------------------------------------------------------------------------------------------------------------------------------------------------------------------------------------------------------------------------------------------------------------------------------------------------------------------------------------------------------------------------------------------------------------------------------------------------------------------------------------------------------------------------------------------------------------------------------------------------------------------------------------------------------------------------------------------------------------------------------------------------------------------------------------------------------------------------------------------------------------------------------------------------------------------------------------------------------------------------------------------------------------------------------------------------------------------------------------------------------------------------------------------------------------------------|

**Supplementary Table S4: The miRNAs in the partial mutp53 signatures of gastric, liver and breast cancers**

|                        | <b>Partial miRNA signature of mutant p53 in stomach adenocarcinoma (<i>n</i> = 38)</b> | <b>Partial miRNA signature of mutant p53 in hepatocellular carcinoma (<i>n</i> = 33)</b> | <b>Partial miRNA signature of mutant p53 in breast carcinoma (<i>n</i> = 45)</b> |
|------------------------|----------------------------------------------------------------------------------------|------------------------------------------------------------------------------------------|----------------------------------------------------------------------------------|
| Cancer-specific miRNAs | hsa-mir-149                                                                            | hsa-mir-149                                                                              | hsa-miR-149                                                                      |
|                        | hsa-mir-18a                                                                            | hsa-mir-18a                                                                              | hsa-miR-18a                                                                      |
|                        | hsa-mir-224                                                                            | hsa-mir-224                                                                              | hsa-miR-224                                                                      |
|                        | hsa-mir-421                                                                            | hsa-mir-421                                                                              | hsa-miR-421                                                                      |
|                        | hsa-mir-449b                                                                           | hsa-mir-449b                                                                             | hsa-miR-449b                                                                     |
|                        | hsa-mir-510                                                                            | hsa-mir-510                                                                              | hsa-miR-510                                                                      |
|                        | hsa-mir-578                                                                            | hsa-mir-578                                                                              | hsa-miR-578                                                                      |
|                        | hsa-mir-660                                                                            | hsa-mir-660                                                                              | hsa-miR-660                                                                      |
|                        | hsa-let-7i                                                                             | hsa-let-7i                                                                               | hsa-let-7i                                                                       |
|                        | hsa-mir-1301                                                                           | hsa-mir-1301                                                                             | hsa-miR-126                                                                      |
|                        | hsa-mir-3163                                                                           | hsa-mir-3163                                                                             | hsa-miR-137                                                                      |
|                        | hsa-mir-3190                                                                           | hsa-mir-3190                                                                             | hsa-miR-154                                                                      |
|                        | hsa-mir-342                                                                            | hsa-mir-342                                                                              | hsa-miR-181a                                                                     |
|                        | hsa-mir-3606                                                                           | hsa-mir-3606                                                                             | hsa-miR-182                                                                      |
|                        | hsa-mir-3616                                                                           | hsa-mir-3616                                                                             | hsa-miR-191                                                                      |
|                        | hsa-mir-3922                                                                           | hsa-mir-3922                                                                             | hsa-miR-200a                                                                     |
|                        | hsa-mir-485                                                                            | hsa-mir-485                                                                              | hsa-miR-202                                                                      |
|                        | hsa-mir-512-1                                                                          | hsa-mir-512-1                                                                            | hsa-miR-302a                                                                     |
|                        | hsa-mir-512-2                                                                          | hsa-mir-512-2                                                                            | hsa-miR-302b                                                                     |
|                        | hsa-mir-548w                                                                           | hsa-mir-548w                                                                             | hsa-miR-302c                                                                     |
|                        | hsa-mir-9-3                                                                            | hsa-mir-9-3                                                                              | hsa-miR-30a                                                                      |
|                        | hsa-mir-1197                                                                           | hsa-mir-1243                                                                             | hsa-miR-30e                                                                      |
|                        | hsa-mir-1246                                                                           | hsa-mir-1290                                                                             | hsa-miR-363                                                                      |
|                        | hsa-mir-1264                                                                           | hsa-mir-137                                                                              | hsa-miR-373                                                                      |
|                        | hsa-mir-1273d                                                                          | hsa-mir-147b                                                                             | hsa-miR-376a                                                                     |
|                        | hsa-mir-1292                                                                           | hsa-mir-2113                                                                             | hsa-miR-378                                                                      |
|                        | hsa-mir-1302-6                                                                         | hsa-mir-3143                                                                             | hsa-miR-380                                                                      |
|                        | hsa-mir-145                                                                            | hsa-mir-3182                                                                             | hsa-miR-425                                                                      |
|                        | hsa-mir-3122                                                                           | hsa-mir-3655                                                                             | hsa-miR-432                                                                      |
|                        | hsa-mir-3123                                                                           | hsa-mir-3659                                                                             | hsa-miR-452                                                                      |
|                        | hsa-mir-3128                                                                           | hsa-mir-591                                                                              | hsa-miR-454                                                                      |
|                        | hsa-mir-346                                                                            | hsa-mir-610                                                                              | hsa-miR-490-3p                                                                   |
|                        | hsa-mir-3649                                                                           | hsa-mir-661                                                                              | hsa-miR-493                                                                      |
| hsa-mir-448            |                                                                                        | hsa-miR-516a-3p                                                                          |                                                                                  |
| hsa-mir-495            |                                                                                        | hsa-miR-517a                                                                             |                                                                                  |
| hsa-mir-513c           |                                                                                        | hsa-miR-518c                                                                             |                                                                                  |

|  |                 |  |              |
|--|-----------------|--|--------------|
|  | hsa-mir-548aa-1 |  | hsa-miR-518e |
|  | hsa-mir-885     |  | hsa-miR-518f |
|  |                 |  | hsa-miR-519e |
|  |                 |  | hsa-miR-526b |
|  |                 |  | hsa-miR-575  |
|  |                 |  | hsa-miR-591  |
|  |                 |  | hsa-miR-610  |
|  |                 |  | hsa-miR-661  |
|  |                 |  | hsa-miR-9    |

The common miRNAs that appeared in all cancer types are presented separately.
